# Supplementary material
Source: publisher site journal article supplement (https://www.dovepress.com/get_supplementary_file.php?f=355889.docx)
Supplement: Supplementary file 1 [file get_supplementary_file.php]

**Supplementary Figure 1** Comparison of significantly differential immune cells between high and low expression of CUL4B groups in MPM.


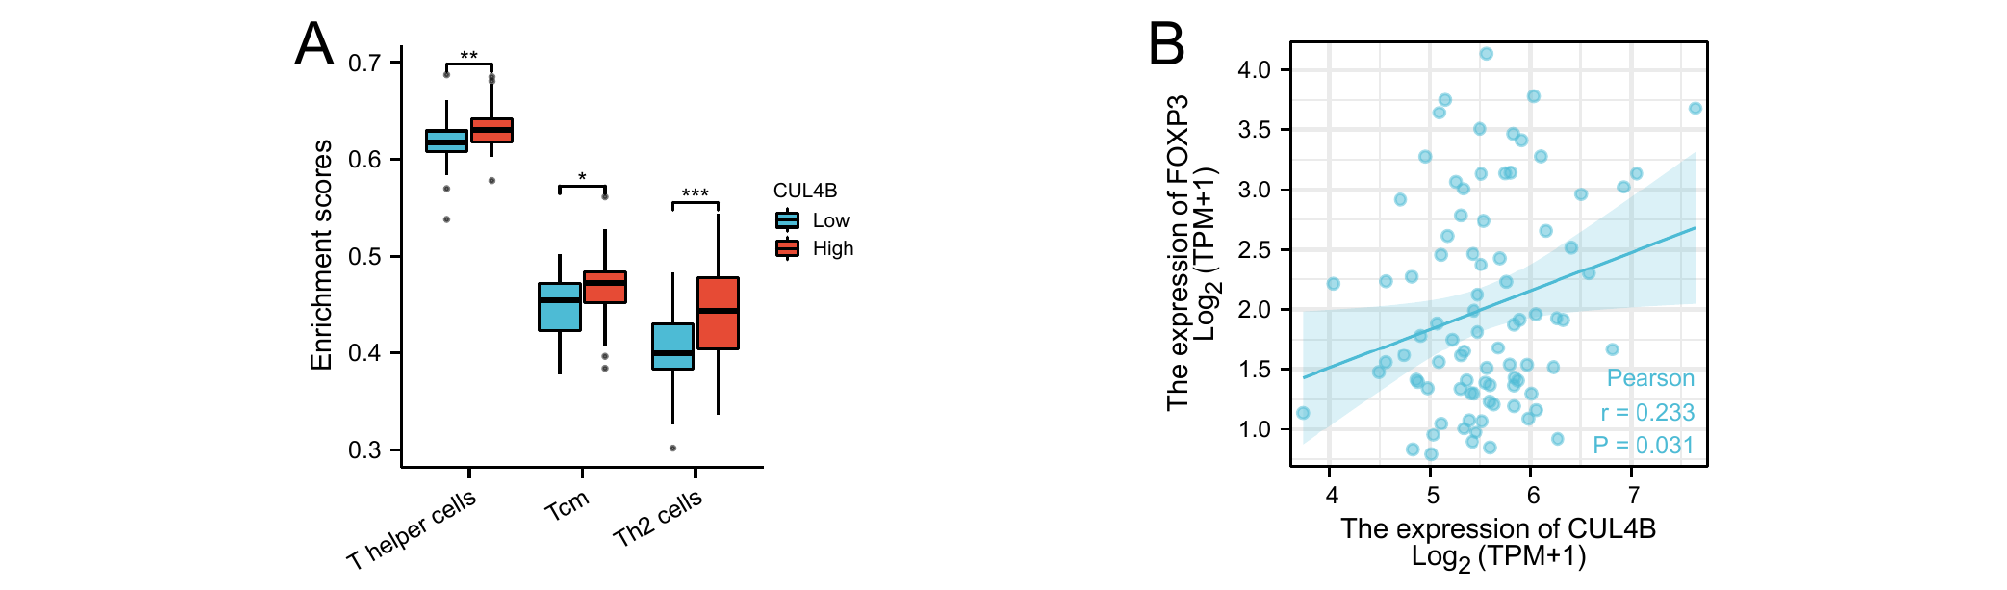


(A) T helper cells, Tcm =T central memory cells, Th2 cells = T helper 2 cells (* *p* < 0.05, ** *p* < 0.01). (B) The correlation between CUL4B expression and T helper cells’ regulator FOXP3 expression. (r = 0.233, P = 0.031).

**Supplementary Table 1** Clinicopathological characteristics based on gene expression in TCGA cohort.

| Characteristic | Low expression of CUL4B | High expression of CUL4B | p |
| --- | --- | --- | --- |
| n | 43 | 43 |  |
| T stage, n (%) |  |  | 0.629 † |
| T1 | 6 (7.1%) | 8 (9.5%) |  |
| T2 | 15 (17.9%) | 11 (13.1%) |  |
| T3 | 13 (15.5%) | 18 (21.4%) |  |
| T4 | 7 (8.3%) | 6 (7.1%) |  |
| N stage, n (%) |  |  | 0.354 ‡ |
| N0 | 21 (25.6%) | 22 (26.8%) |  |
| N1 | 7 (8.5%) | 3 (3.7%) |  |
| N2 | 10 (12.2%) | 16 (19.5%) |  |
| N3 | 2 (2.4%) | 1 (1.2%) |  |
| M stage, n (%) |  |  | 1.000 ‡ |
| M0 | 28 (47.5%) | 28 (47.5%) |  |
| M1 | 2 (3.4%) | 1 (1.7%) |  |
| Pathologic stage, n (%) |  |  | 0.861 ‡ |
| Stage I | 5 (5.8%) | 5 (5.8%) |  |
| Stage II | 9 (10.5%) | 7 (8.1%) |  |
| Stage III | 20 (23.3%) | 24 (27.9%) |  |
| Stage IV | 9 (10.5%) | 7 (8.1%) |  |
| Radiation therapy, n (%) |  |  | 0.944 † |
| No | 29 (34.1%) | 31 (36.5%) |  |
| Yes | 13 (15.3%) | 12 (14.1%) |  |
| Gender, n (%) |  |  | 1.000 † |
| Female | 8 (9.3%) | 7 (8.1%) |  |
| Male | 35 (40.7%) | 36 (41.9%) |  |
| Race, n (%) |  |  | 0.494‡ |
| Asian | 1 (1.2%) | 0 (0%) |  |
| Black or African American | 1 (1.2%) | 0 (0%) |  |
| White | 41 (47.7%) | 43 (50%) |  |
| Histological type, n (%) |  |  | 0.212‡ |
| Biphasic | 9 (10.5%) | 13 (15.1%) |  |
| Diffuse malignant | 4 (4.7%) | 1 (1.2%) |  |
| Epithelioid | 30 (34.9%) | 27 (31.4%) |  |
| Sarcomatoid | 0 (0%) | 2 (2.3%) |  |
| History asbestos exposure, n (%) |  |  | 0.370† |
| No | 5 (7.1%) | 9 (12.9%) |  |
| Yes | 30 (42.9%) | 26 (37.1%) |  |
| Laterality, n (%) |  |  | 0.289† |
| Left | 18 (21.7%) | 12 (14.5%) |  |
| Right | 24 (28.9%) | 29 (34.9%) |  |
| Age, meidan (IQR) | 64 (56.5, 68.5) | 63 (57.5, 69.5) | 0.729§ |

† x2 test.

‡ Fisher exact test.

§ Wilcoxon rank sum test.

**Supplementary Table 2** Gene sets enriched in phenotype.

| Gene set name | NES | P-val | FDR q-val |
| --- | --- | --- | --- |
| High expression |  |  |  |
| KEGG_FOCAL_ADHESION | 1.867798 | 0.002558 | 0.059779 |
| KEGG_REGULATION_OF_ACTIN_CYTOSKELETON | 1.698559 | 0.0025 | 0.059779 |
| KEGG_MATURITY_ONSET_DIABETES_OF_THE_YOUNG | 1.632388 | 0.025346 | 0.209174 |
| KEGG_ARRHYTHMOGENIC_RIGHT_VENTRICULAR_CARDIOMYOPATHY_ARVC | 1.566274 | 0.009456 | 0.112969 |
| KEGG_PROGESTERONE_MEDIATED_OOCYTE_MATURATION | 1.553317 | 0.013986 | 0.148477 |
| KEGG_CALCIUM_SIGNALING_PATHWAY | 1.546929 | 0.005155 | 0.078378 |
| KEGG_ECM_RECEPTOR_INTERACTION | 1.511679 | 0.016241 | 0.161467 |
| KEGG_TGF_BETA_SIGNALING_PATHWAY | 1.503258 | 0.016317 | 0.161467 |
| KEGG_CELL_CYCLE | 1.498421 | 0.012165 | 0.135184 |
| KEGG_ADHERENS_JUNCTION | 1.464743 | 0.014218 | 0.149604 |
| KEGG_GAP_JUNCTION | 1.40804 | 0.023753 | 0.201731 |
| KEGG_NEUROACTIVE_LIGAND_RECEPTOR_INTERACTION | 1.3371 | 0.015789 | 0.159941 |
| KEGG_MELANOGENESIS | 1.315354 | 0.046455 | 0.287681 |
| KEGG_PATHWAYS_IN_CANCER | 1.293247 | 0.011204 | 0.127484 |
| KEGG_CELL_ADHESION_MOLECULES_CAMS | 1.265102 | 0.05 | 0.299496 |
| KEGG_ADHERENS_JUNCTION | 1.464743 | 0.014218 | 0.149604 |
| Low expression |  |  |  |
| KEGG_JAK_STAT_SIGNALING_PATHWAY | -1.41786 | 0.023102 | 0.199772 |
| KEGG_NOD_LIKE_RECEPTOR_SIGNALING_PATHWAY | -1.43927 | 0.035836 | 0.253626 |
| KEGG_CYTOKINE_CYTOKINE_RECEPTOR_INTERACTION | -1.48631 | 0.006431 | 0.091027 |
| KEGG_RIBOFLAVIN_METABOLISM | -1.50771 | 0.046847 | 0.289355 |
| KEGG_TYROSINE_METABOLISM | -1.56514 | 0.026316 | 0.212854 |
| KEGG_ALZHEIMERS_DISEASE | -1.59452 | 0.004902 | 0.078378 |
| KEGG_FATTY_ACID_METABOLISM | -1.60649 | 0.015789 | 0.159941 |
| KEGG_HUNTINGTONS_DISEASE | -1.64024 | 0.001656 | 0.059779 |
| KEGG_SYSTEMIC_LUPUS_ERYTHEMATOSUS | -1.65411 | 0.003322 | 0.0692 |
| KEGG_DRUG_METABOLISM_OTHER_ENZYMES | -1.68598 | 0.001748 | 0.059779 |
| KEGG_COMPLEMENT_AND_COAGULATION_CASCADES | -1.69851 | 0.00346 | 0.0692 |
| KEGG_GRAFT_VERSUS_HOST_DISEASE | -1.71873 | 0.008636 | 0.108597 |
| KEGG_STEROID_HORMONE_BIOSYNTHESIS | -1.7201 | 0.001721 | 0.059779 |
| KEGG_PPAR_SIGNALING_PATHWAY | -1.75036 | 0.003448 | 0.0692 |
| KEGG_LINOLEIC_ACID_METABOLISM | -1.79665 | 0.001779 | 0.059779 |
| KEGG_PARKINSONS_DISEASE | -1.80475 | 0.005172 | 0.078378 |
| KEGG_ARACHIDONIC_ACID_METABOLISM | -1.82501 | 0.00173 | 0.059779 |
| KEGG_DRUG_METABOLISM_CYTOCHROME_P450 | -1.94454 | 0.001724 | 0.059779 |
| KEGG_METABOLISM_OF_XENOBIOTICS_BY_CYTOCHROME_P450 | -1.94638 | 0.001681 | 0.059779 |
| KEGG_RETINOL_METABOLISM | -1.9651 | 0.001709 | 0.059779 |
| KEGG_RIBOSOME | -2.00228 | 0.001724 | 0.059779 |
| KEGG_OXIDATIVE_PHOSPHORYLATION | -2.08635 | 0.001689 | 0.059779 |

NES: normalized enrichment score; NOM: nominal; FDR: false discovery rate.

Gene sets with *P*-value < 0.05 and FDR q-value < 0.25, |NES| > 1 are considered as signiﬁcant.
